# Supplementary material
Source: publisher figshare collection journal article supplement (https://frontiersin.figshare.com/ndownloader/files/30920503)
Supplement: Supplementary file 1 [file 30920503]

Supplementary Table 3: Effects of various seed systems on seed quality, availability, accessibility, affordability and profitability

|  | Seed quality | Seed availability | Seed accessibility | Seed affordability | Profitability of seed business |
| --- | --- | --- | --- | --- | --- |
| Private sector mediated system | Improved quality (Kimaru et al., 2019; Kansiime et al., 2021)  Decreased quality (Onim and Mwaniki, 2008; Croft et al., 2018) | Not improved availability (Kansiime et al., 2018, 2021) | Lower accessibility (Kansiime et al., 2018, Kansiime et al., 2021) | Less affordable (Croft et al., 2018; Kansiime et al., 2021) | Less profitable than community-based seed production (Afari-Sefa et al., 2013)  More profitable than community-based seed production (Kimenye, 2014; Rajendran et al., 2016; Mvungi et al., 2020) |
| Community-based system | Improved quality (Karanja et al., 2011; Afari-Sefa et al., 2013; Kimenye, 2014; Kansiime et al., 2016, 2021) Decreased quality (Ndinya et al., 2020) | Improved availability (Karanja et al., 2011; Afari-Sefa et al., 2013; Kimenye, 2014; Kansiime et al., 2016, 2021; Rajendran et al., 2016) | Improved accessibility (Karanja et al., 2011; Afari-Sefa et al., 2013; Kimenye, 2014; Kansiime et al., 2016, 2021; Rajendran et al., 2016) | More affordable (Kansiime et al., 2016, 2021) | More profitable than Private sector mediated system (Afari-Sefa et al., 2013 ; Kansiime et al., 2018)  Les profitable (Kimenye, 2014; Rajendran et al., 2016) |
| Informal system | Lower quality (Onim and Mwaniki, 2008; Pincus et al., 2018; Kimaru et al., 2019) Increased (Croft et al., 2018) | Lower availability (Pincus et al., 2018) | Lower accessibility (Pincus et al., 2018) | More affordable (Onim and Mwaniki, 2008; Croft et al., 2018) | - |
